# Supplementary material for: Efficacy and safety of osimertinib for leptomeningeal metastases from EGFR-mutant non-small cell lung cancer: a pooled analysis
Source: Springer Nature journal article supplement (doi:10.1186/s40001-023-01219-y), 2023-08-04

ORR

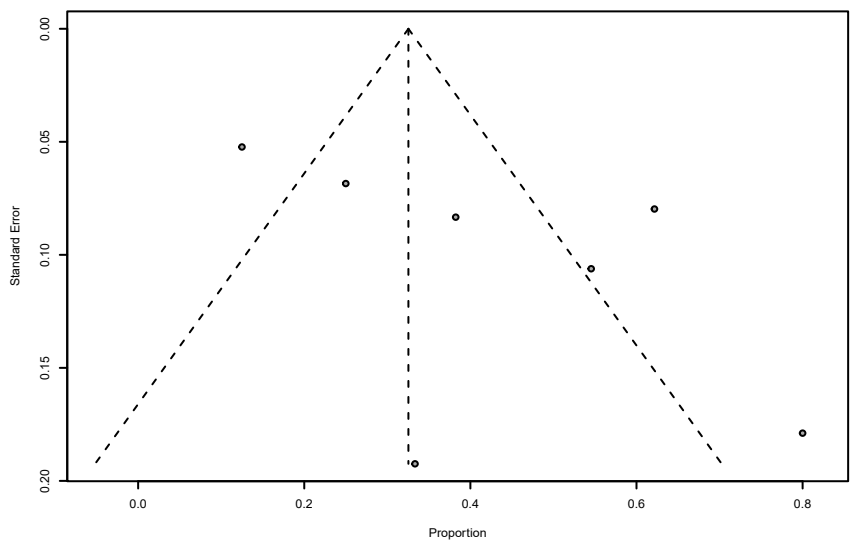

DCR

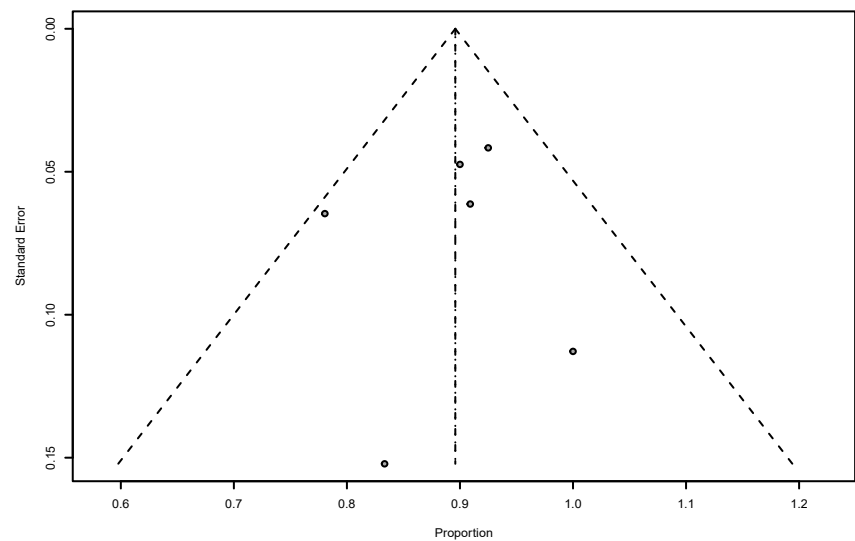

1-y OS

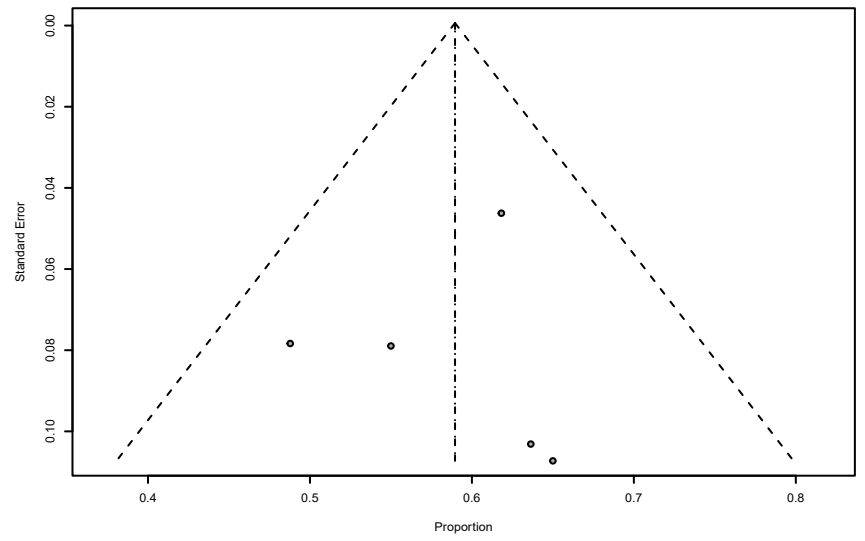

Supplement: MOESM1 [file 25888334]
